# Supplementary material for: The antimicrobial, antibiofilm, and wound healing properties of ethyl acetate crude extract of an endophytic fungus Paecilomyces sp. (AUMC 15510) in earthworm model
Source: PubMed Central journal article supplement (PMC9649741; doi:10.1038/s41598-022-23831-4), 2022-11-10
Supplement: 41598_2022_23831_MOESM1_ESM.pdf [file 41598_2022_23831_MOESM1_ESM.pdf]

**The antimicrobial, antibiofilm, and wound healing properties of ethyl acetate crude extract of an endophytic fungus *Paecilomyces* sp. (AUMC 15510) in earthworm model**

**Authors and affiliations:**

**Shimaa H. Salem<sup>1</sup>, Saad S. El-Maraghy<sup>1</sup>, Ahmed Y. Abdel-Mallek<sup>2</sup>, Mohamed A. A. Abdel-Rahman<sup>3</sup>, Emad H.M. Hassanein<sup>4</sup>, Osama A. Al-Bedak<sup>5</sup>, Fatma El-Zahraa A Abd El-Aziz<sup>6\*</sup>**

<sup>1</sup> Fungal Physiology Laboratory, Botany and Microbiology Department, Faculty of Science, Assiut University, Assiut, Egypt.

<sup>2</sup> Mycology Laboratory, Botany and Microbiology Department, Faculty of Science, Assiut University, Assiut, Egypt.

<sup>3</sup> Plant Protection Research Institute, Agricultural Research Center, Dokki, Giza, Egypt

<sup>4</sup> Department of Pharmacology & Toxicology, Faculty of Pharmacy, Al-Azhar University-Assiut Branch, Assiut, Egypt.

<sup>5</sup> Assiut University Mycological Centre (AUMC), Assiut University, Assiut, Egypt.

<sup>6</sup> Department of Zoology, Faculty of Science, Assiut University, Assiut, Egypt.

\* Corresponding author at Department of Zoology, Faculty of Science, Assiut University, Assiut, Egypt 71516. Tel: +201125853555

E-mail: [Fatma.abdelgalil1@science.aun.edu.eg](mailto:Fatma.abdelgalil1@science.aun.edu.eg) (Fatma El-Zahraa A Abd El-Aziz, PhD).

**ORCID ID: 0000-0001-7260-7598.**

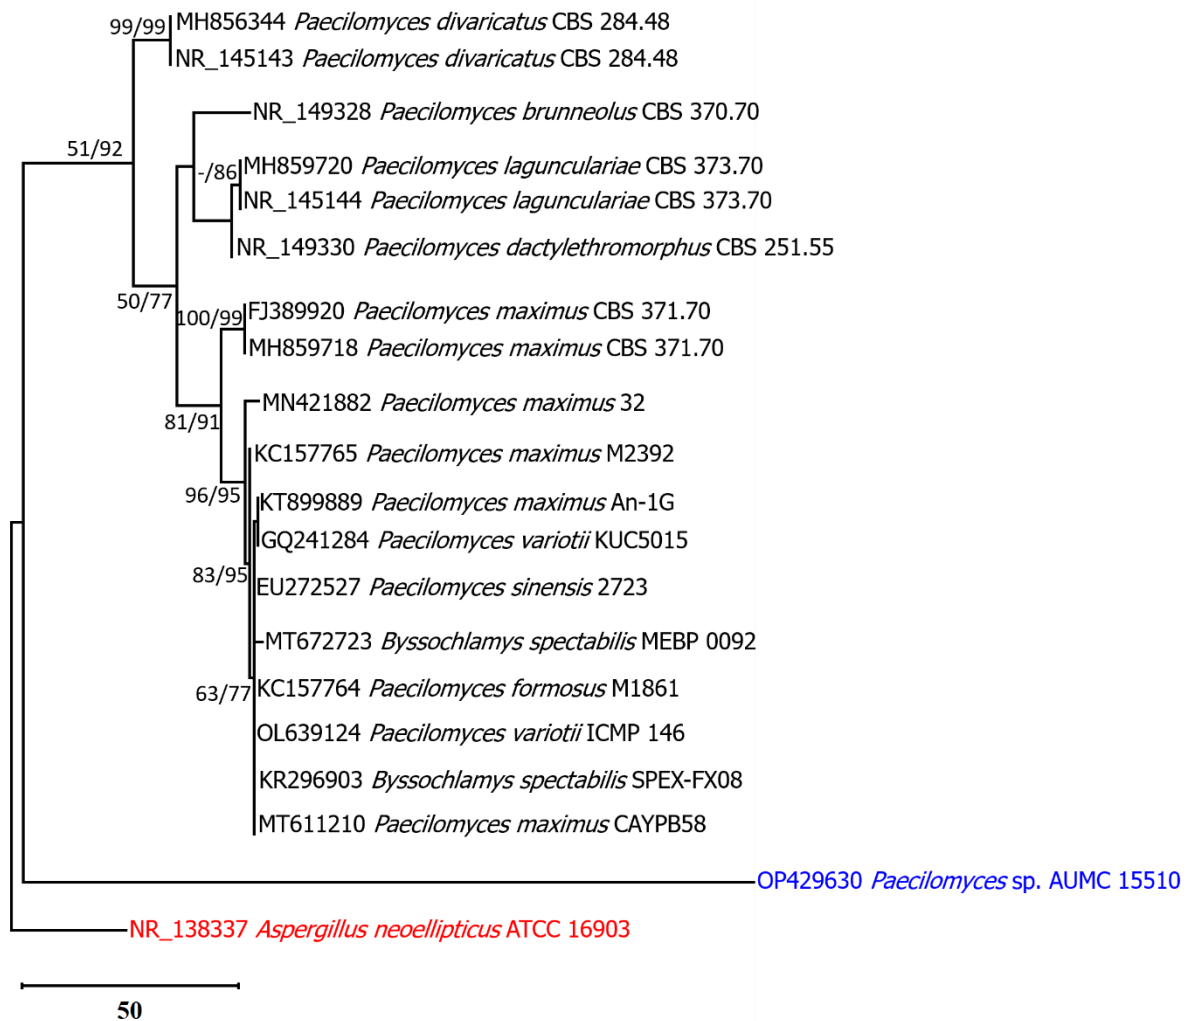

**Figure S1.** Phylogenetic analyses of endophytic fungus *Paecilomyces* sp. (AUMC 15510) isolated from *C. monacantha*. *Aspergillus neoellipticus* ATCC 16903 was designated as an outgroup taxon.

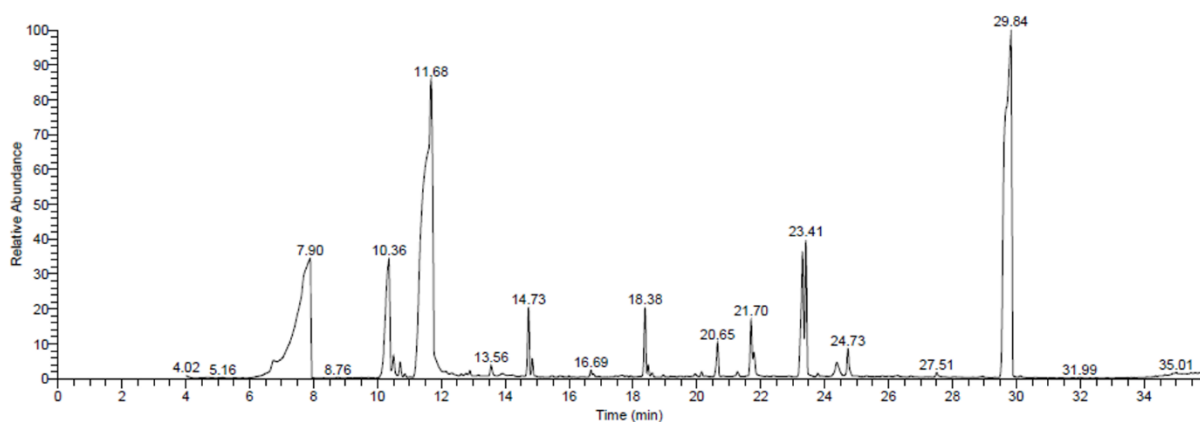

**Figure S2.** GC-MS chromatogram of ethyl acetate crude extract of *Paecilomyces* sp. (AUMC-15510)

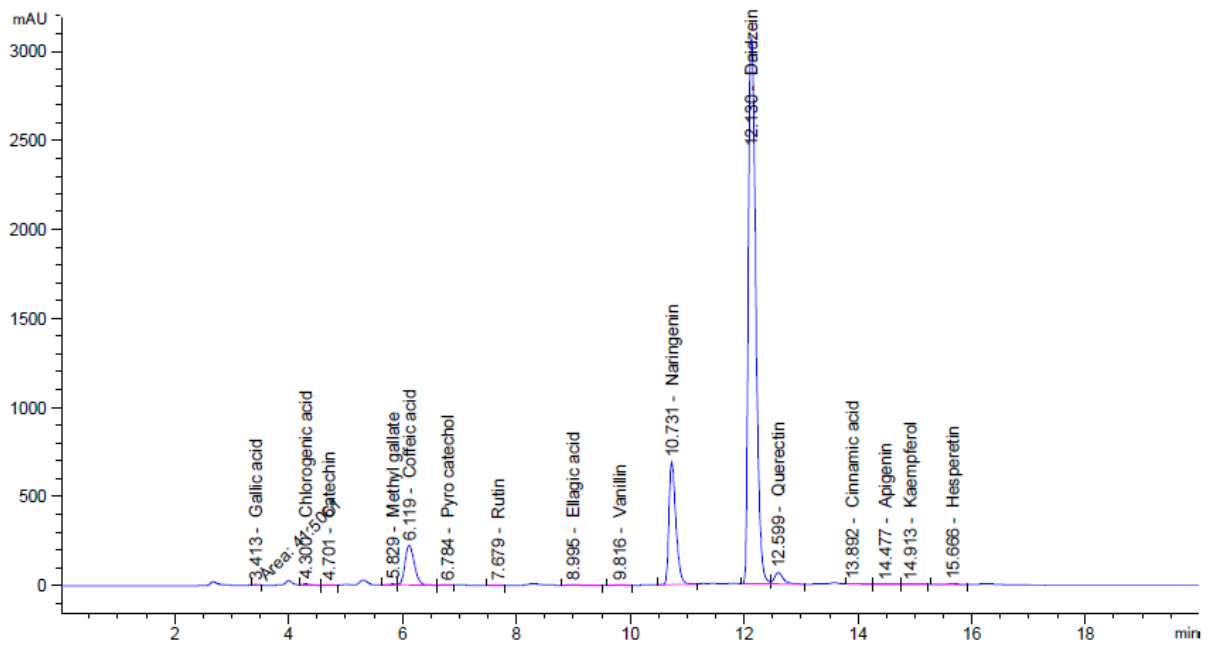

**Figure S3.** HPLC chromatogram of ethyl acetate crude extract of *Paecilomyces* sp. (AUMC-15510)

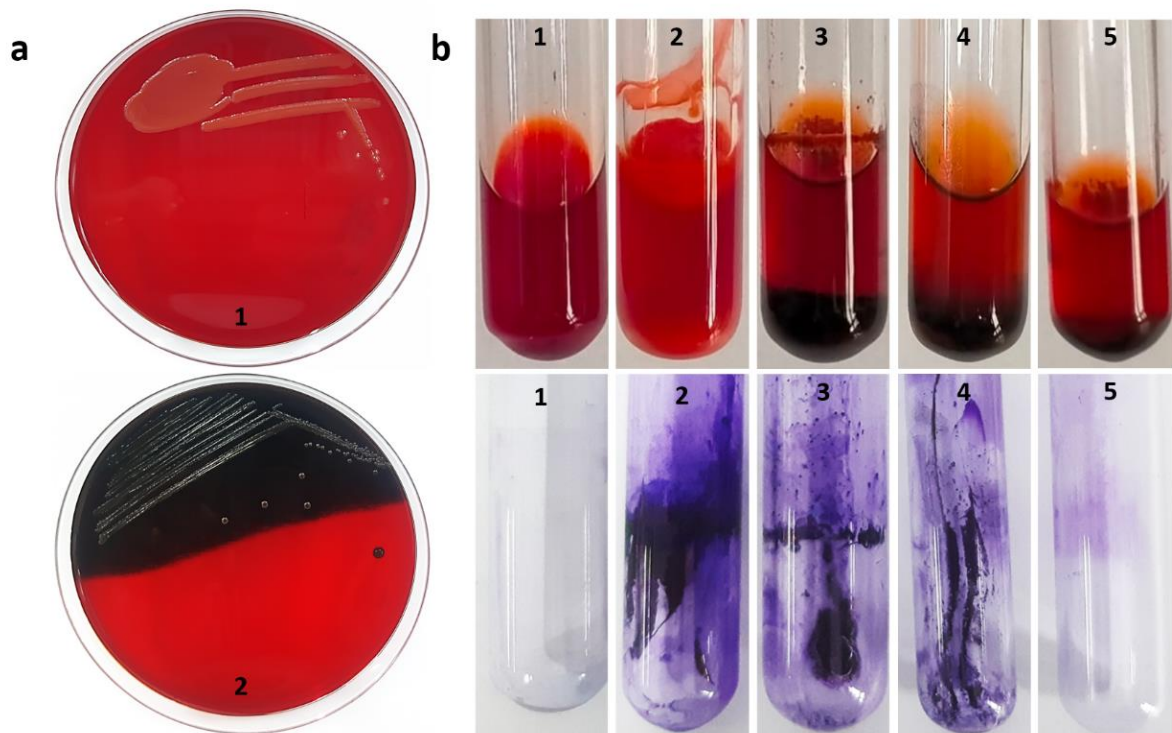

**Figure S4.** (a) Biofilm formation on Congo Red Agar medium. Plate 1: non-biofilm producer reference strain *S. epidermidis* ATCC 12228, Plate 2: biofilm producer strain with black colonies. (b) Biofilm production by tube staining method. Tube 1: control (Broth medium only), Tube 2: biofilm formation by *P. aeruginosa*, Tube 3: *S. aureus* biofilm, Tube 4: *B. subtilis* biofilm, Tube 5: *E. coli* biofilm.

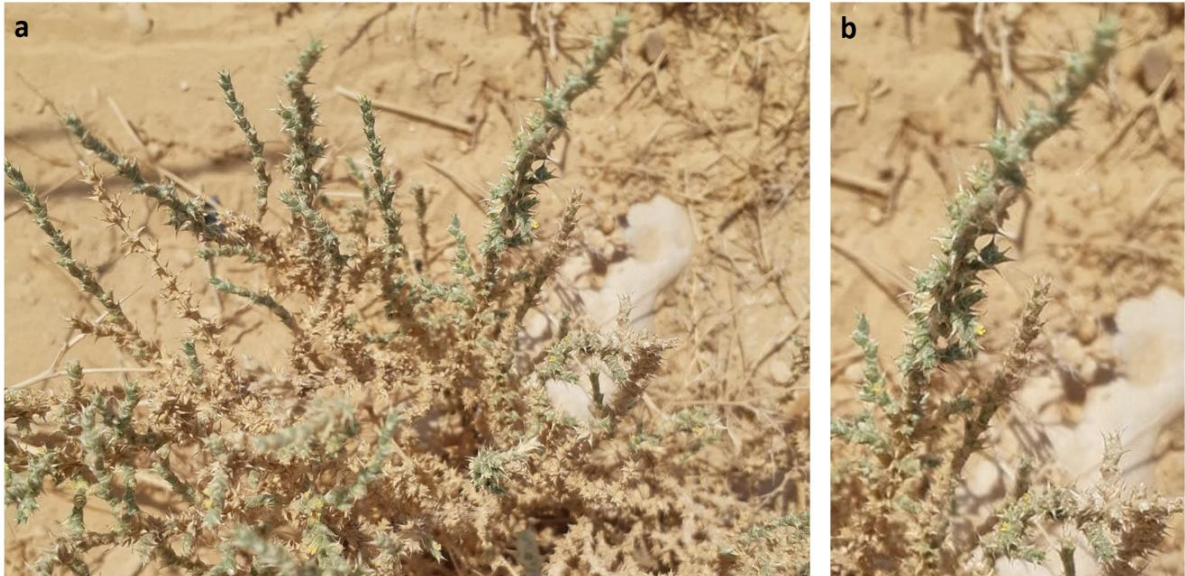

**Figure S5.** *Cornulaca monacantha*: (a) woody shrub (b) *Cornulaca* stem bearing green scale-like leaves with a single spine at the tip.
